# Supplementary material for: Centrosomal protein Dzip1l binds Cby, promotes ciliary bud formation, and acts redundantly with Bromi to regulate ciliogenesis in the mouse
Source: Oxford University Press journal article supplement (doi:10.1242/dev.164236), 2018-02-27
Supplement: dev164236supp.pdf [file dev164236supp.pdf]

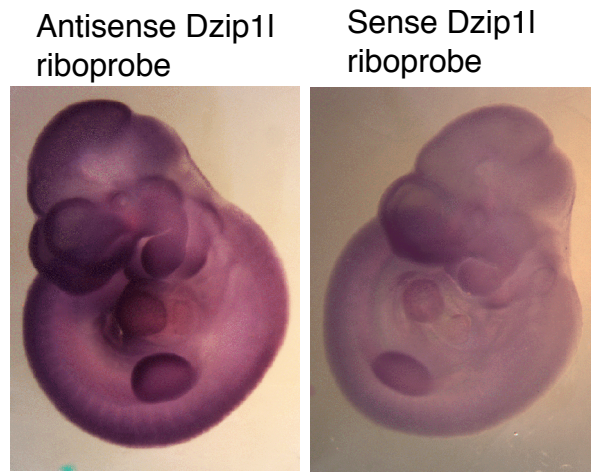

Fig. S1

**Figure S1.** Dzip1l is ubiquitously expressed in E10.5 embryos. Whole mount in situ hybridization of E10.5 wt embryos using antisense or sense (control) Dzip1l riboprobe.

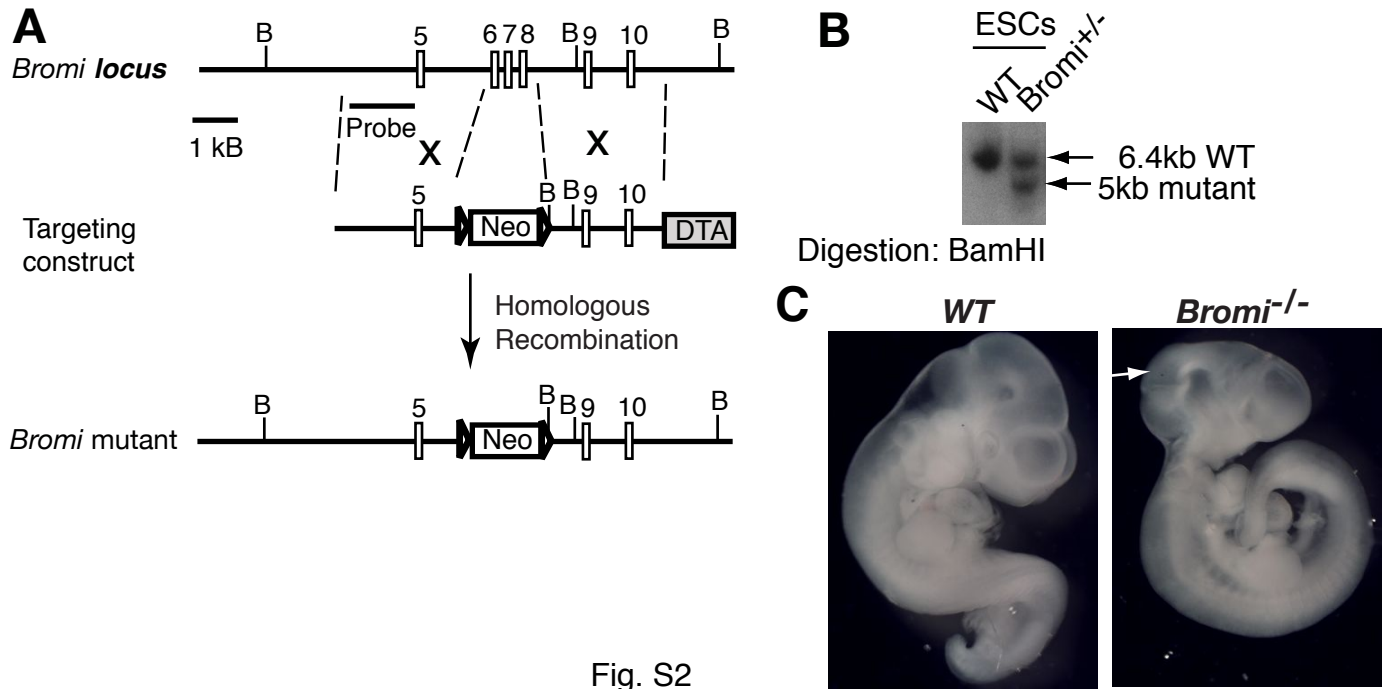

Fig. S2

**Figure S2.** *Bromi* mutant embryos display exencephaly. **(A)** The gene targeting strategy used to create a mouse *Bromi* mutant allele. Open rectangles are referred to as exons and lines as introns. The probe used for Southern blot is shown. Triangle, loxP site; Neo, neomycin; DTA, diphtheria toxin A; number, exons; B, BamHI. The deletion of exons 6-8 is expected to cause a reading frame shift and premature stop at 227th aa, if exon 5 were spliced to exon 9. **(B)** Southern blot of representative mutant and wt ES cell clones. (n = 1 experiment). **(C)** E10.5 wt and *Bromi*<sup>-/-</sup> embryos. An arrow points to exencephaly in the mutant.

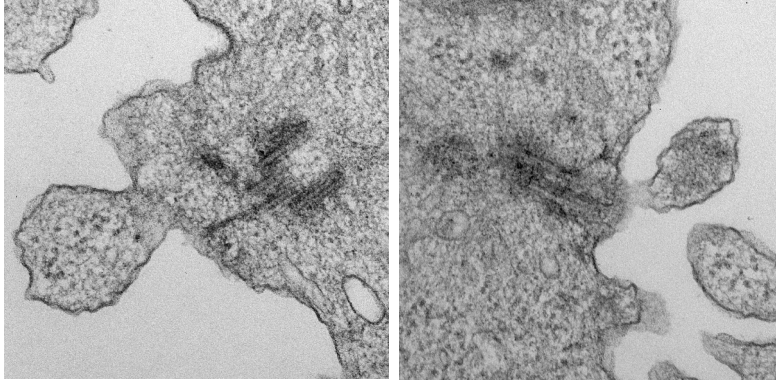

Fig. S3

**Figure S3.** Additional TEM micrographs of *Dzip11* mutant cilia.

**Table S1** MS/MS identified unique peptides for protein chibby homolog 1 (IPI00133582.1, sequence coverage: 41.73%)

| # | Peptide sequence     | z | m/z [Da]   | MH <sup>+</sup> [Da] | ΔM [ppm] | XCorr |
|---|----------------------|---|------------|----------------------|----------|-------|
| 1 | ELELGLDYGTPmNLAGQSLK | 2 | 1133.57471 | 2266.14214           | 6.57     | 5.79  |
| 2 | NQQLLEEENLLR         | 2 | 750.37927  | 1499.75127           | 4.23     | 4.6   |
| 3 | SASLSNLHSLDR         | 2 | 650.33905  | 1299.67082           | 4.33     | 3.64  |
| 4 | DKELDELK             | 2 | 495.2627   | 989.51811            | 3.13     | 3.36  |

Note: m is referred to as oxidized methionine. #4 peptide contains a trypsin missed cleavage site.
